# Supplementary material for: Nonlinear Tactile Estimation Model Based on Perceptibility of Mechanoreceptors Improves Quantitative Tactile Sensing
Source: MDPI journal article supplement (doi:10.3390/s22176697), 2022-09-04
Supplement: s1 [file s1]

Table S1 Surface properties of the samples (mean,  $n = 7$ )

| Sample number | $R_a$ ( $\mu\text{m}$ ) | $W_a$ ( $\mu\text{m}$ ) |
|---------------|-------------------------|-------------------------|
| 1             | 1.699                   | 7.701                   |
| 2             | 0.369                   | 3.704                   |
| 3             | 0.645                   | 4.228                   |
| 4             | 0.576                   | 3.720                   |
| 5             | 0.542                   | 4.859                   |
| 6             | 0.720                   | 4.373                   |
| 7             | 0.280                   | 4.575                   |
| 8             | 0.908                   | 6.409                   |

Table S2 Evaluation terms used for the sensory evaluation

| Evaluation terms<br>(Japanese)    |                                      |                                 |                                          |
|-----------------------------------|--------------------------------------|---------------------------------|------------------------------------------|
| <i>Smooth</i><br>(sarasara-suru)  | <i>Sticky</i><br>(betabeta-suru)     | <i>Pasty</i><br>(petapeta-suru) | <i>Feel friction-drag</i><br>(Hikkakaru) |
| <i>Sleek</i><br>(subesube-suru)   | <i>Slippery</i><br>(tsurutsuru-suru) | <i>Velvety</i><br>(Namerakana)  | <i>Fine</i><br>(Kimegakomakai)           |
| <i>Moisten</i><br>(Shittori-suru) | <i>Rough</i><br>(zarazara-suru)      |                                 |                                          |

Table S3 Characteristics of subjects in each cluster

| Cluster      | Male ratio<br>[%] | Percentage of subjects with experience<br>in sensory evaluation [%] |
|--------------|-------------------|---------------------------------------------------------------------|
| C1           | 40.0              | 20.0                                                                |
| C2           | 68.0              | 28.0                                                                |
| All subjects | 60.0              | 25.7                                                                |

### The detailed formula for calculation

$$\Delta D_{SAI,i} = \begin{cases} L_{SAII,i} - L_{SAI,i}, & \text{if } L_{SAII,i} < d_i \\ d_i - L_{SAI,i}, & \text{if } L_{SAI,i} < d_i \leq L_{SAII,i} \\ 0, & \text{if } d_i \leq L_{SAI,i} \end{cases} \quad (\text{S1})$$

$$D_{SAI} = \sum_{i=0.5}^{20} \Delta D_{SAI,i} \quad (S2)$$

$$\Delta D_{SAISAIIFAI,i} = \begin{cases} d_i - L_{FAI,i}, & \text{if } L_{FAI,i} < d_i \\ 0, & \text{if } d_i \leq L_{FAI,i} \end{cases} \quad (S3)$$

$$D_{SAISAIIFAI} = \sum_{i=0.5}^{20} \Delta D_{SAISAIIFAI,i} \quad (S4)$$

$$\Delta D_{SAISAIH,i} = \begin{cases} L_{FAI,i} - L_{SAIH,i}, & \text{if } L_{FAI,i} < d_i \\ d_i - L_{SAIH,i}, & \text{if } L_{SAIH,i} < d_i \leq L_{FAI,i} \\ 0, & \text{if } d_i \leq L_{SAIH,i} \end{cases} \quad (S5)$$

$$D_{SAISAIH} = \sum_{i=14.73}^{20} \Delta D_{SAISAIH,i} \quad (S6)$$

$$\Delta D_{ALL,i} = \begin{cases} d_i - L_{FAI,i}, & \text{if } L_{FAI,i} < d_i \\ 0, & \text{if } d_i \leq L_{FAI,i} \end{cases} \quad (S7)$$

$$D_{ALL} = \sum_{i=20}^{67} \Delta D_{ALL,i} \quad (S8)$$

$$\Delta D_{SAISAIHFAIH,i} = \begin{cases} \begin{cases} L_{FAI,i} - L_{SAIH,i}, & \text{if } L_{FAI,i} < d_i \\ d_i - L_{SAIH,i}, & \text{if } L_{SAIH,i} < d_i \leq L_{FAI,i} \\ 0, & \text{if } d_i \leq L_{SAIH,i} \end{cases} & (20 \leq i < 67) \\ \begin{cases} d_i - L_{SAIH,i}, & \text{if } L_{SAIH,i} < d_i \\ 0, & \text{if } d_i \leq L_{SAIH,i} \end{cases} & (67 \leq i < 97.44) \\ \begin{cases} d_i - L_{SAI,i}, & \text{if } L_{SAI,i} < d_i \\ 0, & \text{if } d_i \leq L_{SAI,i} \end{cases} & (97.44 \leq i \leq 120) \end{cases} \quad (S9)$$

$$D_{SAISAIHFAIH} = \sum_{i=20}^{120} \Delta D_{SAISAIHFAIH,i} \quad (S10)$$

$$\Delta D_{SAIFAIH,i} = \begin{cases} L_{SAIH,i} - L_{SAI,i}, & \text{if } L_{SAIH,i} < d_i \\ d_i - L_{SAI,i}, & \text{if } L_{SAI,i} < d_i \leq L_{SAIH,i} \\ 0, & \text{if } d_i \leq L_{SAI,i} \end{cases} \quad (S11)$$

$$D_{SAIFAIH} = \sum_{i=20}^{97.44} \Delta D_{SAIFAIH,i} \quad (S12)$$

$$\Delta D_{FAII,i} = \begin{cases} \begin{cases} L_{SAI,i} - L_{FAII,i}, & \text{if } L_{SAI,i} < d_i \\ d_i - L_{FAII,i}, & \text{if } L_{FAII,i} < d_i \leq L_{SAI,i} \\ 0, & \text{if } d_i \leq L_{FAII,i} \end{cases} & (20 \leq i < 97.44) \\ \begin{cases} L_{SAII,i} - L_{FAII,i}, & \text{if } L_{SAII,i} < d_i \\ d_i - L_{FAII,i}, & \text{if } L_{FAII,i} < d_i \leq L_{SAII,i} \\ 0, & \text{if } d_i \leq L_{FAII,i} \end{cases} & (97.44 \leq i < 400) \\ \begin{cases} d_i - L_{FAII,i}, & \text{if } L_{FAII,i} < d_i \\ 0, & \text{if } d_i \leq L_{FAII,i} \end{cases} & (400 \leq i \leq 800) \end{cases} \quad (S13)$$

$$D_{FAII} = \sum_{i=20}^{800} \Delta D_{FAII,i} \quad (S14)$$

$$\Delta D_{SAIIFAII,i} = \begin{cases} \begin{cases} L_{SAI,i} - L_{SAII,i}, & \text{if } L_{SAI,i} < d_i \\ d_i - L_{SAII,i}, & \text{if } L_{SAII,i} < d_i \leq L_{SAI,i} \\ 0, & \text{if } d_i \leq L_{SAII,i} \end{cases} & (97.44 < i \leq 120) \\ \begin{cases} d_i - L_{SAII,i}, & \text{if } L_{SAII,i} < d_i \\ 0, & \text{if } d_i \leq L_{SAII,i} \end{cases} & (120 < i \leq 400) \end{cases} \quad (S15)$$

$$D_{SAIIFAII} = \sum_{i=97.44}^{400} \Delta D_{SAIIFAII,i} \quad (S16)$$

where,  $d_i$  is the value of the amplitude spectrum at  $i$  Hz, and  $L_{m,i}$  is the value of the threshold of the mechanoreceptor  $m$  at  $i$  Hz.
