# Supplementary figures and images for: Nonlinear Tactile Estimation Model Based on Perceptibility of Mechanoreceptors Improves Quantitative Tactile Sensing
Source: MDPI journal article supplement (doi:10.3390/s22176697), 2022-09-04

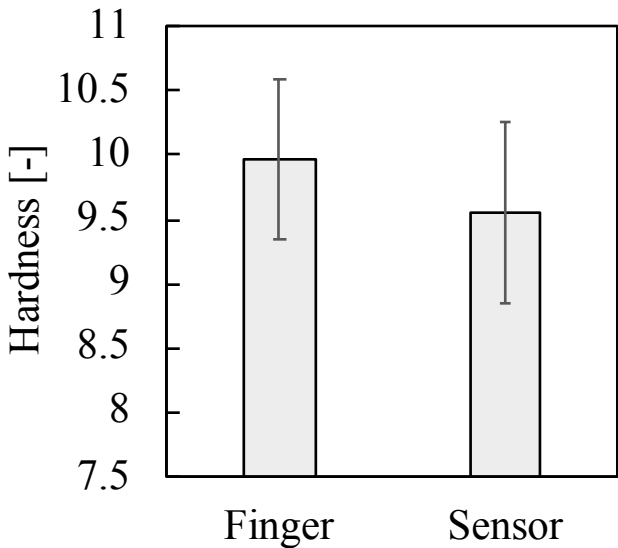

Supplement: s1 [file s1]

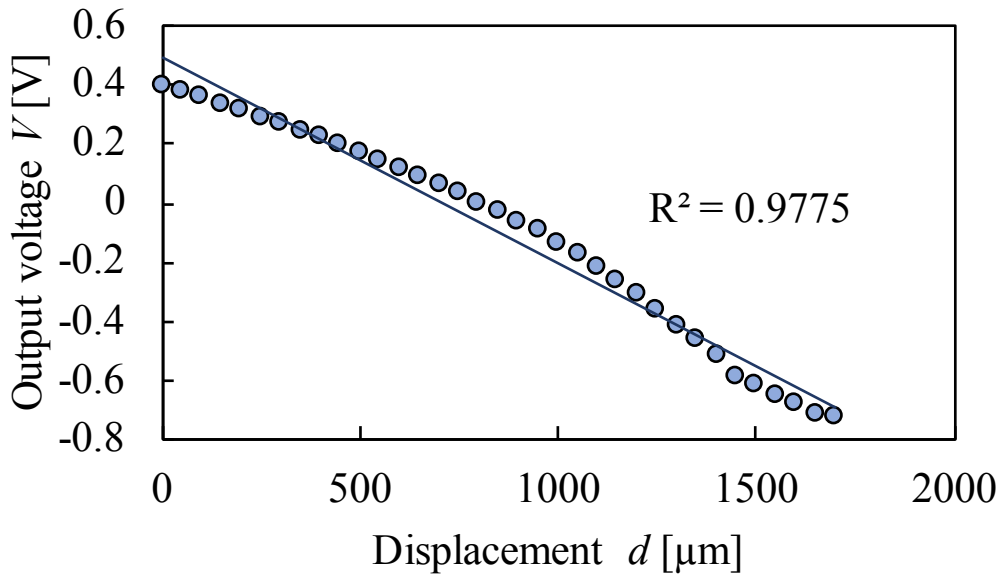

Supplement: s1 [file s1]

Merkel's disk (SA I)

Meissner corpuscle (FA I)

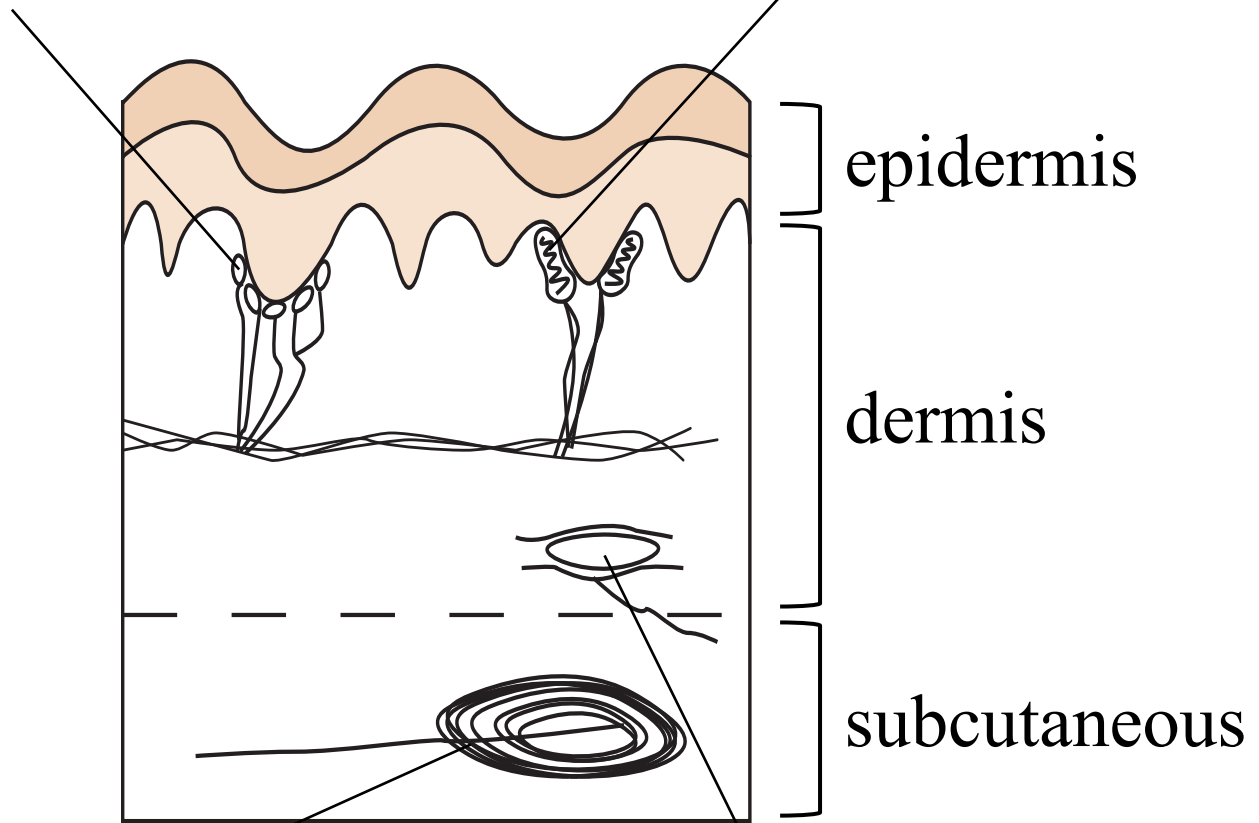

Pacinian corpuscle (FA II)

Ruffini ending (SA II)

Supplement: s1 [file s1]
